# Supplementary material for: Preparation of a “Branch-Fruit” structure chitosan nanofiber physical hydrogels with high mechanical strength and pH-responsive controlled drug release properties
Source: Royal Society of Chemistry journal article supplement (doi:10.1039/d2ra01622b), 2022-01-01
Supplement: d2ra01622b1.pdf [file d2ra01622b1.pdf]

**Preparation of a “Branch-Fruit” structure chitosan  
nanofiber/Hyaluronic acid/ $\beta$ -glycerophosphate disodium physical  
hydrogels with high mechanical strength and pH-responsive  
controlled drug release properties**

Table S1 Composition of CSNF/HA/ $\beta$ -GP composite hydrogels.

| Hydrogel<br>name | Chitosan solution<br>(C) |                |                        | $\beta$ -GP/HA solution<br>(G-A) |             | $V_C:V_{G-A}^a$ |
|------------------|--------------------------|----------------|------------------------|----------------------------------|-------------|-----------------|
|                  | CSP<br>(w/v)             | CSNFs<br>(w/v) | Acetic acid<br>(mol/l) | $\beta$ -GP<br>(w/v)             | HA<br>(w/v) |                 |
| HG <sub>0</sub>  | 2.0%                     | —              |                        |                                  |             |                 |
| HG <sub>1</sub>  | —                        | 1.0%           |                        |                                  |             |                 |
| HG <sub>2</sub>  | —                        | 1.5%           | 0.03                   | 10%                              | 1.5%        | 4:1             |
| HG <sub>3</sub>  | —                        | 2.0%           |                        |                                  |             |                 |

<sup>a</sup> $V_C:V_{G-A}$ : the volume ratio of Chitosan solution to  $\beta$ -GP/HA solution

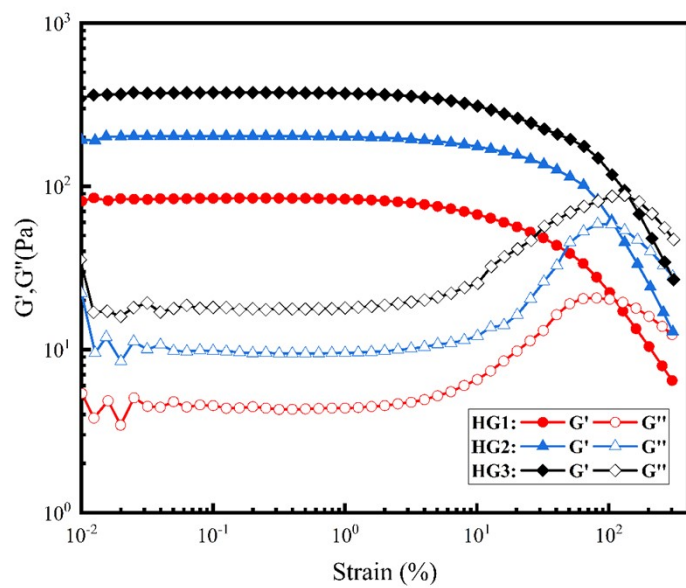

Figure S1. The rheological curves of HG<sub>1</sub>, HG<sub>2</sub> and HG<sub>3</sub> in the strain mode.

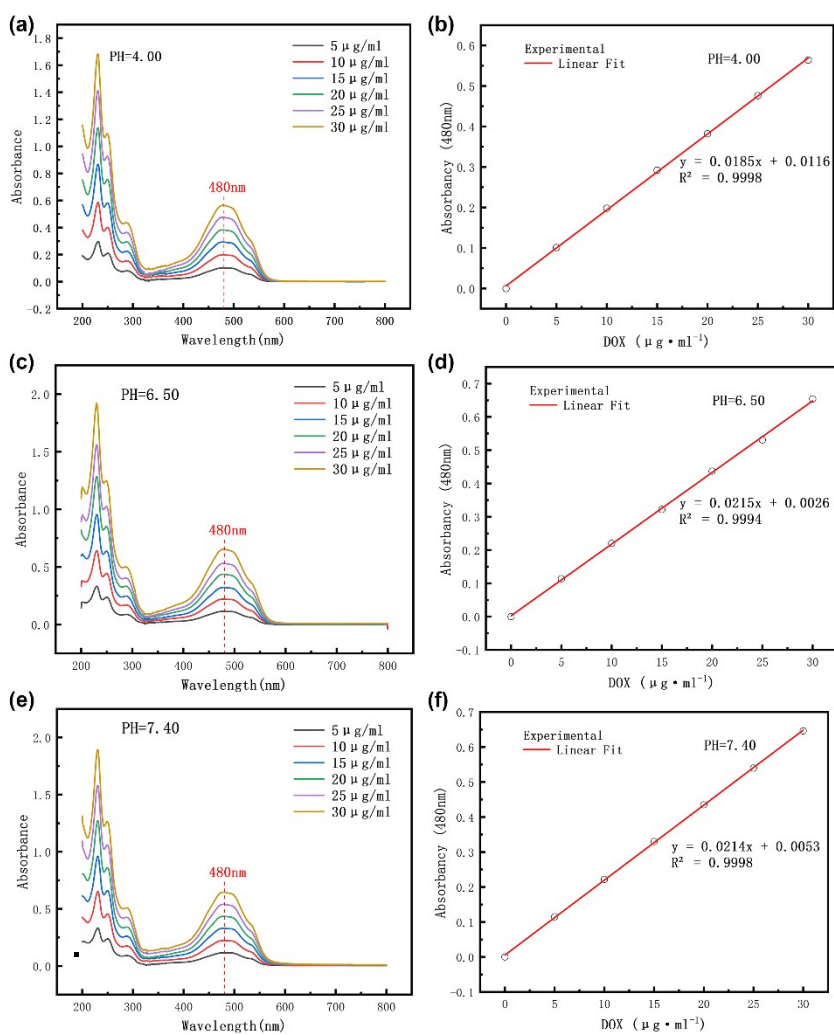

Figure S2. UV absorption spectra of DOX in PBS at different pH (a, c, e) and calibration curves for absorbance of DOX concentration at 480 nm (b, d, f). Figure b) pH=7.40, the calibration curve equation is  $y=0.0214x+0.0053(R^2=0.9998)$ ; d) pH=6.50, the calibration curve equation is  $y=0.0215x+0.0026(R^2=0.9994)$ ; f) pH=4.00, the calibration curve equation is  $y=0.0185x+0.0116$  ( $R^2=0.9998$ )

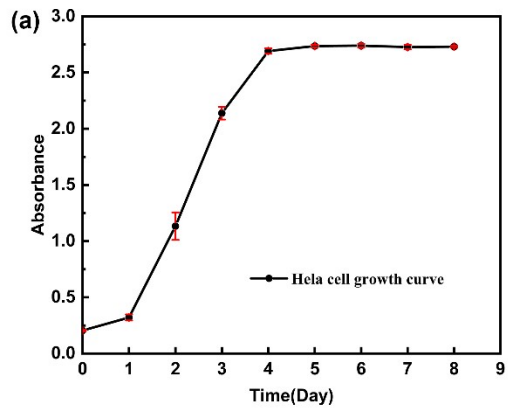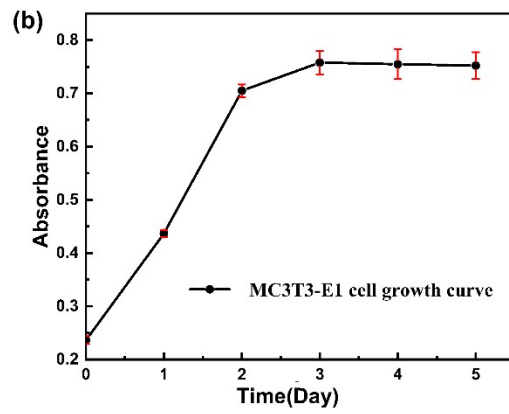

Figure S3. a) HeLa cell and b) MC3T3-E1 cell growth curve

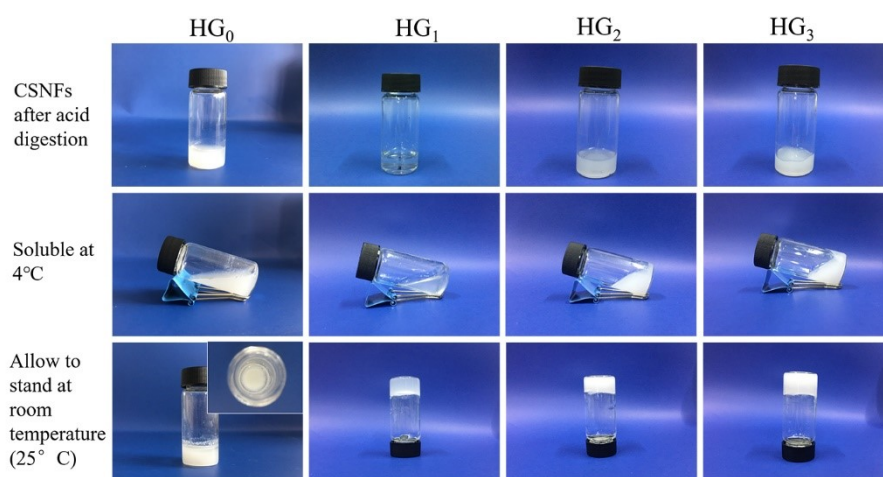

Figure S4. Gelation diagram of different CSNFs concentration gel system from sol to gel

Table S2. Fitting parameter values of different models for DOX release in HG<sub>1</sub> at different pHs

| pH     | parameter values | Zero-order | First-order      | Huguchi        | Ritger-Peppas |
|--------|------------------|------------|------------------|----------------|---------------|
|        |                  | $F=kt+b$   | $F=1-b(e^{-kt})$ | $F=kt^{1/2}+b$ | $F=kt^n+b$    |
| pH=7.4 | k                | 0.1804     | 0.0027           | 2.04218        | 37758         |
|        | b                | 23.326     | 76.96            | 19.02914       | -37739        |
|        | n                | -          | -                | -              | 0.0000967     |
|        | R <sup>2</sup>   | 0.3172     | 0.331            | 0.52815        | 0.8575        |
| pH=6.5 | k                | 0.7659     | 0.0456           | 8.04516        | 7128.1        |
|        | b                | 44.432     | 70.867           | 28.77339       | -7095.1       |
|        | n                | -          | -                | -              | 0.0018        |
|        | R <sup>2</sup>   | 0.5197     | 0.743            | 0.74538        | 0.9367        |
| pH=4.0 | k                | 0.8107     | 0.2441           | 8.73221        | -196.23       |
|        | b                | 61.874     | 82.973           | 44.40403       | 245.32        |
|        | n                | -          | -                | -              | -0.0806       |
|        | R <sup>2</sup>   | 0.4501     | 0.9914           | 0.67863        | 0.9413        |

Table S3 Fitting parameter values of different models for DOX release in HG<sub>2</sub> at different pHs

| pH     | parameter values | Zero-order | First-order      | Huguchi        | Ritger-Peppas |
|--------|------------------|------------|------------------|----------------|---------------|
|        |                  | $F=kt+b$   | $F=1-b(e^{-kt})$ | $F=kt^{1/2}+b$ | $F=kt^n+b$    |
| pH=7.4 | k                | 0.19495    | 0.00276          | 2.14744        | 35811.27      |
|        | b                | 20.7529    | 79.55177         | 16.33363       | -35794.66     |
|        | n                | -          | -                | -              | 0.000105      |
|        | R <sup>2</sup>   | 0.36474    | 0.37998          | 0.58059        | 0.90088       |
| pH=6.5 | k                | 0.56253    | 0.01876          | 6.10135        | 73516.64325   |
|        | b                | 42.58558   | 62.97613         | 30.28787       | -73484.56193  |
|        | n                | -          | -                | -              | 0.000139      |
|        | R <sup>2</sup>   | 0.42566    | 0.50652          | 0.65084        | 0.928005      |
| pH=4.0 | k                | 0.95361    | 0.1512           | 9.9833         | 773.849       |
|        | b                | 50.6603    | 87.55781         | 31.30365       | -737.227      |
|        | n                | -          | -                | -              | 0.01957       |
|        | R <sup>2</sup>   | 0.53217    | 0.97723          | 0.75806        | 0.93376       |

Table S4 Fitting parameter values of different models for DOX release in HG<sub>3</sub> at different pHs

| pH     | parameter values | Zero-order | First-order      | Huguchi        | Ritger-Peppas |
|--------|------------------|------------|------------------|----------------|---------------|
|        |                  | $F=kt+b$   | $F=1-b(e^{-kt})$ | $F=kt^{1/2}+b$ | $F=kt^n+b$    |
| pH=7.4 | k                | 0.21369    | 0.00302          | 2.38584        | 35039.1874    |
|        | b                | 19.17771   | 81.19365         | 14.22419       | -35024.677    |
|        | n                | -          | -                | -              | 0.000119      |
|        | R <sup>2</sup>   | 0.33966    | 0.35545          | 0.55029        | 0.85728       |
| pH=6.5 | k                | 0.56661    | 0.01268          | 5.96334        | 8256.11655    |
|        | b                | 29.04593   | 74.63911         | 17.41417       | -8235.64359   |
|        | n                | -          | -                | -              | 0.00114       |
|        | R <sup>2</sup>   | 0.51258    | 0.59586          | 0.73794        | 0.93494       |
| pH=4.0 | k                | 0.82562    | 0.12901          | 8.72524        | 31683.13      |
|        | b                | 50.86211   | 82.25877         | 33.76434       | -31645.25     |
|        | n                | -          | -                | -              | 0.0004399     |
|        | R <sup>2</sup>   | 0.50453    | 0.88579          | 0.73237        | 0.95005       |
